# Supplementary material for: Simulating permeability reduction by clay mineral nanopores in a tight sandstone by combining computer X-ray microtomography and focussed ion beam scanning electron microscopy imaging
Source: Copernicus journal article supplement (doi:10.5194/se-12-1-2021), 2021-01-11
Supplement: Supplementary file 1 [file se-12-1-2021-supplement.zip]

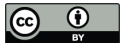

## *Supplement of*

# **Simulating permeability reduction by clay mineral nanopores in a tight sandstone by combining computer X-ray microtomography and focussed ion beam scanning electron microscopy imaging**

**Arne Jacob et al.**

*Correspondence to:* Arne Jacob ([a.jacob@uni-mainz.de](mailto:a.jacob@uni-mainz.de))

- [se-12-1-2021-supplement-title-page.pdf](#)
- [2048x1536x227\\_AL\\_CF2\\_NLM000.tif](#)
- [FIB\\_Illites\\_Simulating\\_permeability\\_reduction\\_classifier.ilp](#)

The copyright of individual parts of the supplement might differ from the CC BY 4.0 License.
